# Supplementary material for: Crowdsourced versus expert evaluations of the vesico-urethral anastomosis in the robotic radical prostatectomy: is one superior at discriminating differences in automated performance metrics?
Source: Springer Nature journal article supplement (doi:10.1007/s11701-018-0814-5), 2018-04-30
Supplement: MOESM1 [file 15728962]

## Sheet: Sheet1
	Depth Perception						Bimanual Dexterity						Efficiency						Robotic Control						Total Score
	Metric	Group 1		Group 2		p (sig.)	Metric	Group 1		Group 2		p (sig.)	Metric	Group 1		Group 2		p (sig.)	Metric	Group 1		Group 2		p (sig.)	Metric	Group 1		Group 2		p (sig.)
		Median	IQR	Median	IQR			Median	IQR	Median	IQR			Median	IQR	Median	IQR			Median	IQR	Median	IQR			Median	IQR	Median	IQR
Expert 1	Completion Time (s)	693.787	299.0, 1010.7	794.384	608.0, 926.7	0.285	Completion Time (s)	743.108	310.8, 964.9	757.864	655.1, 986.5	0.315	Completion Time (s)	393.379	282.9, 888.1	807.745	668.0, 1041.4	0.04	Completion Time (s)	743.108	298.9, 919.1	757.864	607.9, 1075.5	0.196	Completion Time (s)	393.379	282.9, 888.0	807.745	668.0, 1041.4	0.04
	Dominant Arm: Path Length (m)	8.7959	506, 14.2	8.3781	6.66, 13.95	0.567	Dominant Arm: Path Length (m)	7.2938	5.56, 13.83	9.1125	6.95, 14.67	0.511	Dominant Arm: Path Length (m)	6.1266	5.38, 15.13	9.429	7.06, 13.83	0.27	Dominant Arm: Path Length (m)	7.2938	5.56, 14.16	9.1125	6.66, 13.50	0.605	Dominant Arm: Path Length (m)	6.1266	5.39, 15.14	9.429	7..06, 13.83	0.27
	Dominant Arm: Active Time (s)	644.807	282.1, 888.6	716.126	557.0, 836.7	0.311	Dominant Arm: Active Time (s)	674.319	289.0, 858.3	716.126	600.5, 903.5	0.288	Dominant Arm: Active Time (s)	374.494	261.6, 799.2	753.467	615.2, 947.4	0.046	Dominant Arm: Active Time (s)	674.319	282.1, 828.1	716.126	557.0, 995.9	0.177	Dominant Arm: Active Time (s)	374.494	261.6, 799.2	753.467	615.2, 947.4	0.046
	Dominant Arm: Velocity (m/s)	0.016595	0.015, 0.020	0.012945	0.011, 0.015	0.008	Dominant Arm: Velocity (m/s)	0.016595	0.017, 0.019	0.013078	0.010, 0.014	0.016	Dominant Arm: Velocity (m/s)	0.018281	0.015, 0.021	0.013375	0.010, 0.015	<0.001	Dominant Arm: Velocity (m/s)	0.01749	0.015, 0.019	0.012945	0.009, 0.013	0.001	Dominant Arm: Velocity (m/s)	0.018281	0.016, 0.021	0.013375	0.010, 0.014	<0.001
	Non-Dominant Arm: Path Length (m)	7.2335	4.81, 12.80	7.2292	6.03, 11.79	0.192	Non-Dominant Arm: Path Length (m)	6.1963	6.19, 11.79	8.0507	6.38, 13.55	0.262	Non-Dominant Arm: Path Length (m)	5.0636	4.59, 12.01	8.7961	6.16, 12.67	0.087	Non-Dominant Arm: Path Length (m)	6.1963	4.81, 12.80	8.0507	6.03, 11.79	0.261	Non-Dominant Arm: Path Length (m)	5.0636	4.59, 12.01	8.7961	6.16, 12.67	0.087
	Non-Dominant Arm: Active Time (s)	645.783	283.7, 901.9	714.049	561.2, 827.7	0.311	Non-Dominant Arm: Active Time (s)	667.844	667.8, 866.9	714.049	604.7, 899.6	0.288	Non-Dominant Arm: Active Time (s)	374.543	261.0, 808.3	748.922	618.4, 947.7	0.046	Non-Dominant Arm: Active Time (s)	667.844	283.7, 831.9	714.049	561.2, 983.8	0.177	Non-Dominant Arm: Active Time (s)	374.543	261.0, 808.3	748.922	618.4, 947.7	0.046
	Non-Dominant Arm: Velocity (m/s)	0.015472	0.012, 0.017	0.011022	0.010, 0.014	0.041	Non-Dominant Arm: Velocity (m/s)	0.015092	0.011, 0.017	0.011022	0.010, 0.014	0.175	Non-Dominant Arm: Velocity (m/s)	0.015775	0.011, 0.018	0.011669	0.009, 0.014	0.016	Non-Dominant Arm: Velocity (m/s)	0.015472	0.011, 0.017	0.011022	0.009, 0.014	0.055	Non-Dominant Arm: Velocity (m/s)	0.015775	0.012, 0.018	0.011669	0.009, 0.014	0.016
	Camera: Path Length (m)	1.2159	0.79, 2.01	1.2155	0.72, 1.90	1	Camera: Path Length (m)	1.2159	0.76, 1.92	1.2155	0.78, 2.01	0.887	Camera: Path Length (m)	1.1927	0.64, 1.76	1.2928	0.92, 2.04	0.503	Camera: Path Length (m)	1.2159	0.74, 1.83	1.2155	1.00, 2.07	0.643	Camera: Path Length (m)	1.1927	0.64, 1.77	1.2928	0.93, 2.04	0.503
	Camera: Utilization Frequency (press/s)	0.0842	0, 0.093	0.068	0.029, 0.095	0.723	Camera: Utilization Frequency (press/s)	0.0842	0, 0.107	0.068	0.068, 0.085	0.754	Camera: Utilization Frequency (press/s)	0.0851	0.015, 0.130	0.0649	0.019, 0.087	0.47	Camera: Utilization Frequency (press/s)	0.0859	0, 0.122	0.0636	0.029, 0.085	0.367	Camera: Utilization Frequency (press/s)	0.0851	0.015, 0.130	0.0649	0.019, 0.087	0.47
	Masterclutch: Utilization Frequency (press/s)	0	0, 0	0	0, 0.004	0.216	Masterclutch: Utilization Frequency (press/s)	0	0, 0	0	0, 0.005	0.14	Masterclutch: Utilization Frequency (press/s)	0	0, 0	0	0, 0.001	0.347	Masterclutch: Utilization Frequency (press/s)	0	0, 0	0	0, 0.004	0.216	Masterclutch: Utilization Frequency (press/s)	0	0, 0	0	0, 0.001	0.347
Expert 2	Completion Time (s)	322.63	288.3, 992.8	762.066	493.7, 982.2	0.447	Completion Time (s)	620.898	288.8, 1029.5	743.108	472.0, 953.7	0.858	Completion Time (s)	693.787	286.9, 1159.3	762.066	463.1, 913.5	1	Completion Time (s)	508.209	282.9, 1029.6	781.023	497.6, 953.7	0.406	Completion Time (s)	694.507	322.6, 694.5	743.108	454.1, 919.2	0.96
	Dominant Arm: Path Length (m)	5.5691	5.29, 13.17	9.1125	6.16, 14.83	0.272	Dominant Arm: Path Length (m)	8.8727	5.56, 13.66	8.7959	6.10, 14.38	0.695	Dominant Arm: Path Length (m)	8.7959	5.44, 12.49	8.3781	6.07, 14.82	0.575	Dominant Arm: Path Length (m)	7.1825	5.38, 13.66	9.429	6.17, 14.40	0.374	Dominant Arm: Path Length (m)	9.863	5.56, 9.86	8.7959	6.05, 13.50	0.88
	Dominant Arm: Active Time (s)	295.907	268.5, 893.1	683.045	462.1, 867.3	0.447	Dominant Arm: Active Time (s)	561.983	265.1, 925.5	678.785	449.8, 845.9	0.858	Dominant Arm: Active Time (s)	644.807	263.1, 1065.6	683.045	445.2, 821.8	1	Dominant Arm: Active Time (s)	470.357	261.6, 925.5	687.305	465.1, 845.9	0.406	Dominant Arm: Active Time (s)	626.975	295.9, 626.9	678.785	440.6, 818.1	0.96
	Dominant Arm: Velocity (m/s)	0.017753	0.015, 0.020	0.01429	0.013, 0.019	0.192	Dominant Arm: Velocity (m/s)	0.016795	0.014, 0.021	0.014505	0.013, 0.018	0.295	Dominant Arm: Velocity (m/s)	0.01478	0.011, 0.021	0.015035	0.012, 0.018	0.821	Dominant Arm: Velocity (m/s)	0.016956	0.015, 0.021	0.014075	0.011, 0.018	0.097	Dominant Arm: Velocity (m/s)	0.016795	0.015, 0.017	0.014705	0.013, 0.019	0.6
	Non-Dominant Arm: Path Length (m)	5.0833	4.72, 12.05	7.2694	5.58, 12.33	0.447	Non-Dominant Arm: Path Length (m)	7.3494	5.05, 13.27	7.2335	5.22, 11.86	1	Non-Dominant Arm: Path Length (m)	8.7961	5.00, 12.63	7.1933	5.16, 12.33	0.821	Non-Dominant Arm: Path Length (m)	6.9397	4.96, 13.27	7.2335	5.63, 11.86	0.669	Non-Dominant Arm: Path Length (m)	9.7845	5.08, 9.78	7.2335	5.04, 10.92	0.807
	Non-Dominant Arm: Active Time (s)	296.258	268.6, 895.9	683.104	462.4, 874.3	0.447	Non-Dominant Arm: Active Time (s)	564.11	264.1, 927.8	679.175	449.9, 846.8	0.858	Non-Dominant Arm: Active Time (s)	645.783	263.5, 1044.2	683.104	445.3, 821.9	1	Non-Dominant Arm: Active Time (s)	471.02	261.0, 927.8	687.032	465.48, 846.8	0.406	Non-Dominant Arm: Active Time (s)	628.049	296.3, 628.0	679.175	440.7, 831.9	0.96
	Non-Dominant Arm: Velocity (m/s)	0.015472	0.013, 0.019	0.012321	0.010, 0.016	0.192	Non-Dominant Arm: Velocity (m/s)	0.016125	0.012, 0.019	0.012487	0.010, 0.016	0.262	Non-Dominant Arm: Velocity (m/s)	0.015092	0.011, 0.019	0.012321	0.010, 0.016	0.447	Non-Dominant Arm: Velocity (m/s)	0.015717	0.014, 0.019	0.011669	0.010, 0.015	0.023	Non-Dominant Arm: Velocity (m/s)	0.016125	0.015, 0.016	0.012487	0.010, 0.016	0.427
	Camera: Path Length (m)	1.2159	0.86, 0.13	1.2155	0.75, 2.0	0.869	Camera: Path Length (m)	1.3354	1.18, 1.87	1.1383	0.71, 1.96	0.592	Camera: Path Length (m)	1.2159	1.07, 2.04	1.2312	0.69, 1.84	0.668	Camera: Path Length (m)	1.1927	1.06, 1.74	1.2928	0.71, 2.07	0.711	Camera: Path Length (m)	1.6133	1.21, 1.61	1.1695	0.74, 1.84	0.54
	Camera: Utilization Frequency (press/s)	0.0881	0.043, 0.126	0.0636	0.010, 0.091	0.243	Camera: Utilization Frequency (press/s)	0.087	0.021, 0.143	0.0649	0.019, 0.092	0.409	Camera: Utilization Frequency (press/s)	0.0623	0, 0.125	0.0776	0.043, 0.092	0.818	Camera: Utilization Frequency (press/s)	0.0723	0, 0.090	0.071	0.048, 0.107	0.754	Camera: Utilization Frequency (press/s)	0.1247	0.088, 0.125	0.0649	0, 0.090	0.107
	Masterclutch: Utilization Frequency (press/s)	0	0, 0	0	0, 0	0.621	Masterclutch: Utilization Frequency (press/s)	0	0, 0	0	0, 0	0.695	Masterclutch: Utilization Frequency (press/s)	0	0, 0,	0	0, 0	0.621	Masterclutch: Utilization Frequency (press/s)	0	0, 0	0	0, 0	0.511	Masterclutch: Utilization Frequency (press/s)	0	0, 0	0	0, 0	0.807
Expert 3	Completion Time (s)	744.503	325.1, 987.8	743.108	573.8, 1305.3	0.621	Completion Time (s)	497.605	304.9, 913.5	807.745	718.4, 1131.5	0.065	Completion Time (s)	322.63	264.4, 751.3	852.232	655.1, 1053.9	0.002	Completion Time (s)	591.83	304.9, 913.5	807.745	692.6, 1042.3	0.095	Completion Time (s)	327.631	270.9, 850.1	807.745	642.2, 1010.7	0.031
	Dominant Arm: Path Length (m)	8.0449	5.67, 14.00	9.429	7.08, 13.10	0.621	Dominant Arm: Path Length (m)	6.1712	5.56, 13.84	10.5612	8.06, 14.56	0.095	Dominant Arm: Path Length (m)	5.5691	5.17, 9.78	10.6912	7.30, 14.99	0.007	Dominant Arm: Path Length (m)	6.1712	5.56, 12.73	10.5612	7.31, 15.99	0.049	Dominant Arm: Path Length (m)	5.7609	5.24, 13.22	10.5612	7.29, 15.27	0.023
	Dominant Arm: Active Time (s)	676.552	299.0, 873.5	687.305	528.3, 1197.7	0.575	Dominant Arm: Active Time (s)	465.07	285.5, 821.8	753.467	659.5, 1030.9	0.074	Dominant Arm: Active Time (s)	295.907	242.5, 695.7	778.385	600.5, 952.7	0.003	Dominant Arm: Active Time (s)	551.981	285.6, 821.8	753.467	630.0, 950.1	0.108	Dominant Arm: Active Time (s)	302.154	248.7, 768.7	753.467	585.7, 888.6	0.036
	Dominant Arm: Velocity (m/s)	0.016377	0.014, 0.019	0.012514	0.011, 0.015	0.083	Dominant Arm: Velocity (m/s)	0.016377	0.014, 0.019	0.012514	0.010, 0.016	0.043	Dominant Arm: Velocity (m/s)	0.018809	0.017, 0.022	0.01393	0.013, 0.015	0.007	Dominant Arm: Velocity (m/s)	0.015688	0.014, 0.019	0.014505	0.012, 0.017	0.276	Dominant Arm: Velocity (m/s)	0.018281	0.015, 0.022	0.014075	0.013, 0.016	0.031
	Non-Dominant Arm: Path Length (m)	7.4962	4.96, 12.33	7.2335	6.64, 12.26	0.575	Non-Dominant Arm: Path Length (m)	5.6296	4.84, 12.33	8.7961	6.71, 13.77	0.095	Non-Dominant Arm: Path Length (m)	5.044	4.59, 7.98	9.2058	6.43, 14.47	0.007	Non-Dominant Arm: Path Length (m)	5.6296	4.84, 10.88	7.3053	6.67, 16.50	0.074	Non-Dominant Arm: Path Length (m)	5.0636	4.70, 11.39	8.7961	6.19, 14.42	0.048
	Non-Dominant Arm: Active Time (s)	673.509	299.3, 884.4	687.032	531.3, 1207.9	0.575	Non-Dominant Arm: Active Time (s)	465.48	286.8, 821.9	748.922	656.8, 1015.2	0.074	Non-Dominant Arm: Active Time (s)	296.258	242.1, 708.1	770.319	604.7, 953.8	0.003	Non-Dominant Arm: Active Time (s)	552.566	286.8, 821.9	748.922	629.4, 959.6	0.108	Non-Dominant Arm: Active Time (s)	302.368	247.8, 786.7	748.922	591.0, 901.9	0.036
	Non-Dominant Arm: Velocity (m/s)	0.014356	0.012, 0.017	0.010376	0.010, 0.013	0.112	Non-Dominant Arm: Velocity (m/s)	0.01532	0.012, 0.017	0.010376	0.009, 0.013	0.037	Non-Dominant Arm: Velocity (m/s)	0.015588	0.013, 0.018	0.011613	0.010, 0.015	0.065	Non-Dominant Arm: Velocity (m/s)	0.014356	0.011, 0.017	0.010529	0.010, 0.016	0.301	Non-Dominant Arm: Velocity (m/s)	0.01553	0.012, 0.018	0.011558	0.010, 0.015	0.08
	Camera: Path Length (m)	1.1927	0.75, 1.97	1.2928	0.91, 1.82	0.921	Camera: Path Length (m)	1.1927	0.67, 1.84	1.5673	0.92, 2.07	0.487	Camera: Path Length (m)	1.0377	0.59, 1.48	1.5111	1.12, 2.06	0.121	Camera: Path Length (m)	1.153	0.67, 1.97	1.5673	0.94, 1.95	0.452	Camera: Path Length (m)	1.1036	0.61, 1.88	1.4549	1.11, 2.07	0.311
	Camera: Utilization Frequency (press/s)	0.0636	0, 0.090	0.0856	0.065, 0.151	0.243	Camera: Utilization Frequency (press/s)	0.0845	0.043, 0.092	0.0623	0, 0.104	0.388	Camera: Utilization Frequency (press/s)	0.0903	0.019, 0.134	0.0636	0.014, 0.086	0.301	Camera: Utilization Frequency (press/s)	0.0746	0.010, 0.090	0.071	0.029, 0.132	0.89	Camera: Utilization Frequency (press/s)	0.0862	0.029, 0.106	0.0623	0, 0.086	0.428
	Masterclutch: Utilization Frequency (press/s)	0	0, 0	0	0, 0.001	0.818	Masterclutch: Utilization Frequency (press/s)	0	0, 0	0	0, 0	0.934	Masterclutch: Utilization Frequency (press/s)	0	0, 0	0	0, 0	0.452	Masterclutch: Utilization Frequency (press/s)	0	0, 0	0	0, 0	0.934	Masterclutch: Utilization Frequency (press/s)	0	0, 0	0	0, 0	0.935
Expert 4	Completion Time (s)	743.108	327.6, 964.9	769.466	527.9, 1576.3	0.543	Completion Time (s)	801.221	462.1, 1028.9	489.874	251.2, 693.8	0.034	Completion Time (s)	787.86	363.0, 987.8	693.787	406.25, 956.6	0.852	Completion Time (s)	787.86	330.1, 1012.2	642.215	505.3, 642.2	0.492	Completion Time (s)	794.697	454.1, 1010.7	668.001	316.7, 926.6	0.403
	Dominant Arm: Path Length (m)	8.7959	5.76, 13.21	11.2974	6.43, 15.54	0.452	Dominant Arm: Path Length (m)	10.6912	6.03, 15.35	6.2013	5.32, 8.79	0.125	Dominant Arm: Path Length (m)	8.3614	5.98, 15.14	8.7959	5.85, 13.83	0.936	Dominant Arm: Path Length (m)	9.9951	5.86, 14.44	7.3273	6.83, 7.32	0.783	Dominant Arm: Path Length (m)	9.429	6.05, 16.12	8.0616	5.51, 13.67	0.467
	Dominant Arm: Active Time (s)	678.785	302.1, 858.3	694.492	490.8, 1427.4	0.543	Dominant Arm: Active Time (s)	733.105	430.3, 942.1	459.155	230.3, 644.8	0.034	Dominant Arm: Active Time (s)	695.764	341.4, 873.5	644.807	377.53, 870.1	0.894	Dominant Arm: Active Time (s)	700.025	305.3, 900.6	585.682	470.9, 585.7	0.497	Dominant Arm: Active Time (s)	712.744	444.6, 888.6	615.244	292.5, 836.7	0.434
	Dominant Arm: Velocity (m/s)	0.015366	0.014, 0.019	0.012943	0.010, 0.018	0.231	Dominant Arm: Velocity (m/s)	0.015073	0.012, 0.019	0.014075	0.013, 0.017	0.883	Dominant Arm: Velocity (m/s)	0.015432	0.011, 0.020	0.01478	0.014, 0.018	1	Dominant Arm: Velocity (m/s)	0.015763	0.013, 0.019	0.013641	0.012, 0.014	0.238	Dominant Arm: Velocity (m/s)	0.014705	0.011, 0.019	0.015073	0.014, 0.018	0.893
	Non-Dominant Arm: Path Length (m)	7.2335	4.99, 10.85	10.2774	5.83, 16.52	0.169	Non-Dominant Arm: Path Length (m)	8.4604	5.41, 14.44	5.7359	4.52, 8.79	0.064	Non-Dominant Arm: Path Length (m)	6.7508	4.87, 12.29	7.2335	5.41, 12.67	0.689	Non-Dominant Arm: Path Length (m)	7.2694	5.01, 13.20	7.153	6.13, 7.15	0.906	Non-Dominant Arm: Path Length (m)	7.3053	5.04, 12.80	7.1933	5.05, 11.79	0.851
	Non-Dominant Arm: Active Time (s)	679.175	302.3, 866.9	691.371	492.3, 1448.2	0.543	Non-Dominant Arm: Active Time (s)	743.035	430.8, 941.7	459.35	230.8, 645.8	0.034	Non-Dominant Arm: Active Time (s)	708.162	341.5, 884.4	645.783	377.8, 863.7	0.894	Non-Dominant Arm: Active Time (s)	712.09	305.4, 910.3	591.027	471.6, 591.0	0.497	Non-Dominant Arm: Active Time (s)	737.149	440.7, 901.9	618.405	293.1, 827.7	0.434
	Non-Dominant Arm: Velocity (m/s)	0.013621	0.010, 0.017	0.011432	0.010, 0.017	0.748	Non-Dominant Arm: Velocity (m/s)	0.01513	0.010, 0.017	0.012487	0.010, 0.014	0.836	Non-Dominant Arm: Velocity (m/s)	0.011856	0.009, 0.017	0.013621	0.011, 0.016	0.406	Non-Dominant Arm: Velocity (m/s)	0.012875	0.010, 0.017	0.013621	0.010, 0.014	0.906	Non-Dominant Arm: Velocity (m/s)	0.011558	0.010, 0.017	0.013442	0.011, 0.016	0.467
	Camera: Path Length (m)	1.2159	0.77, 1.84	1.6047	0.79, 2.31	0.592	Camera: Path Length (m)	1.5111	1.05, 2.07	1.0377	0.59, 1.14	0.021	Camera: Path Length (m)	1.1539	0.66, 2.02	1.2928	1.08, 1.93	0.65	Camera: Path Length (m)	1.3354	0.78, 2.03	1.1175	0.68, 1.12	0.398	Camera: Path Length (m)	1.1695	0.74, 2.08	1.2544	0.95, 1.88	0.893
	Camera: Utilization Frequency (press/s)	0.0649	0.019, 0.107	0.0779	0.018, 0.085	0.748	Camera: Utilization Frequency (press/s)	0.0776	0.053, 0.103	0.0595	0, 0.093	0.423	Camera: Utilization Frequency (press/s)	0.0591	0.009, 0.085	0.0856	0.033, 0.132	0.152	Camera: Utilization Frequency (press/s)	0.068	0.029, 0.091	0.0856	0, 0.086	0.723	Camera: Utilization Frequency (press/s)	0.0587	0, 0.084	0.0869	0.049, 0.127	0.066
	Masterclutch: Utilization Frequency (press/s)	0	0, 0	0	0, 0.005	0.642	Masterclutch: Utilization Frequency (press/s)	0	0, 0	0	0, 0	0.534	Masterclutch: Utilization Frequency (press/s)	0	0, 0	0	0, 0	0.728	Masterclutch: Utilization Frequency (press/s)	0	0, 0	0	0, 0	0.723	Masterclutch: Utilization Frequency (press/s)	0	0, 0	0	0, 0	0.809
Averaged Experts	Completion Time (s)	725.545	316.7, 942.1	807.745	505.3, 1016.5	0.357	Completion Time (s)	497.605	304.9, 987.8	807.745	718.4, 956.6	0.121	Completion Time (s)	332.632	277.6, 919.1	794.384	607.9, 1012.2	0.12	Completion Time (s)	743.108	322.6, 919.2	750.766	607.9, 1213.1	0.4	Completion Time (s)	707.983	299.0, 1010.7	775.427	608.0, 926.7	0.338
	Dominant Arm: Path Length (m)	8.0449	5.57, 13.66	9.429	6.83, 15.27	0.423	Dominant Arm: Path Length (m)	6.1712	5.56, 13.66	10.5612	8.06, 14.38	0.121	Dominant Arm: Path Length (m)	5.9528	5.33, 12.18	9.9951	7.78, 14.44	0.058	Dominant Arm: Path Length (m)	7.2938	5.57, 14.16	9.1125	7.20, 13.59	0.514	Dominant Arm: Path Length (m)	6.2013	5.57, 14.16	9.9951	7.20, 19.95	0.238
	Dominant Arm: Active Time (s)	676.552	292.4, 843.2	753.467	470.9, 936.8	0.352	Dominant Arm: Active Time (s)	465.07	285.6, 873.5	753.467	659.5, 870.1	0.136	Dominant Arm: Active Time (s)	308.4	254.8, 828.1	720.386	557.0, 900.6	0.134	Dominant Arm: Active Time (s)	678.785	295.9, 828.1	699.137	557.0, 1111.5	0.4	Dominant Arm: Active Time (s)	674.319	282.1, 888.6	720.386	557.0, 836.7	0.311
	Dominant Arm: Velocity (m/s)	0.016377	0.014, 0.020	0.013375	0.012, 0.014	0.074	Dominant Arm: Velocity (m/s)	0.016377	0.014, 0.019	0.013641	0.011, 0.016	0.084	Dominant Arm: Velocity (m/s)	0.017753	0.015, 0.022	0.01393	0.013, 0.016	0.075	Dominant Arm: Velocity (m/s)	0.016595	0.014, 0.019	0.013078	0.012, 0.014	0.021	Dominant Arm: Velocity (m/s)	0.016595	0.014, 0.020	0.013713	0.013, 0.016	0.103
	Non-Dominant Arm: Path Length (m)	6.7149	4.90, 11.29	7.3053	6.13, 14.42	0.27	Non-Dominant Arm: Path Length (m)	5.6296	4.84, 12.29	8.7961	6.71, 12.67	0.121	Non-Dominant Arm: Path Length (m)	5.0833	4.81, 10.78	8.0507	6.18, 14.44	0.075	Non-Dominant Arm: Path Length (m)	6.1963	4.94, 12.80	8.0507	6.90, 12.50	0.303	Non-Dominant Arm: Path Length (m)	5.5232	4.81, 12.80	8.0507	6.89, 11.80	0.177
	Non-Dominant Arm: Active Time (s)	673.509	293.1, 849.4	748.922	471.6, 935.6	0.357	Non-Dominant Arm: Active Time (s)	465.48	286.8, 884.4	748.922	656.8, 863.7	0.136	Non-Dominant Arm: Active Time (s)	308.478	253.4, 831.9	717.977	561.2, 717.9	0.134	Non-Dominant Arm: Active Time (s)	679.175	296.3, 831.9	697.352	561.2, 1118.5	0.4	Non-Dominant Arm: Active Time (s)	667.844	283.7, 901.9	717.977	561.1, 827.7	0.311
	Non-Dominant Arm: Velocity (m/s)	0.014356	0.010, 0.017	0.011669	0.011, 0.015	0.423	Non-Dominant Arm: Velocity (m/s)	0.01532	0.012, 0.017	0.010529	0.010, 0.013	0.084	Non-Dominant Arm: Velocity (m/s)	0.015588	0.011, 0.017	0.012078	0.010, 0.015	0.183	Non-Dominant Arm: Velocity (m/s)	0.015092	0.011, 0.017	0.011022	0.010, 0.014	0.198	Non-Dominant Arm: Velocity (m/s)	0.015472	0.010, 0.017	0.012078	0.010, 0.014	0.338
	Camera: Path Length (m)	1.1927	0.71, 1.88	1.2928	1.29, 2.07	0.458	Camera: Path Length (m)	1.1927	0.67, 1.97	1.5673	0.93, 1.96	0.559	Camera: Path Length (m)	1.1695	0.63, 1.83	1.4301	1.02, 2.03	0.403	Camera: Path Length (m)	1.2159	0.74, 2.01	1.2155	1.01, 1.89	1	Camera: Path Length (m)	1.1695	0.63, 2.01	1.4301	0.013, 1.90	0.397
	Camera: Utilization Frequency (press/s)	0.0732	0, 0.099	0.071	0.058, 0.085	1	Camera: Utilization Frequency (press/s)	0.0732	0.009, 0.092	0.071	0.029, 0.104	0.89	Camera: Utilization Frequency (press/s)	0.0842	0.038, 0.093	0.068	0, 0.097	0.647	Camera: Utilization Frequency (press/s)	0.0842	0, 0.093	0.068	0.043, 0.104	0.926	Camera: Utilization Frequency (press/s)	0.0623	0, 0.090	0.0779	0.044, 0.127	0.683
	Masterclutch: Utilization Frequency (press/s)	0	0, 0	0	0, 0.007	0.11	Masterclutch: Utilization Frequency (press/s)	0	0, 0	0	0, 0.005	0.187	Masterclutch: Utilization Frequency (press/s)	0	0, 0	0	0, 0.001	0.375	Masterclutch: Utilization Frequency (press/s)	0	0, 0	0	0, 0.005	0.333	Masterclutch: Utilization Frequency (press/s)	0	0, 0	0	0, 0.004	0.216
Crowd	Completion Time (s)	693.787	322.6, 919.1	852.232	746.3, 1118.5	0.092	Completion Time (s)	624.222	304.9, 898.8	807.745	668.0, 1131.5	0.136	Completion Time (s)	332.632	264.4, 930.5	762.066	493.7, 987.8	0.272	Completion Time (s)	725.545	330.1, 942.1	896.718	642.2, 896.7	0.273	Completion Time (s)	479.732	293.6, 882.5	807.745	693.8, 1010.7	0.066
	Dominant Arm: Path Length (m)	6.8318	5.56, 13.50	10.1251	7.1, 15.53	0.221	Dominant Arm: Path Length (m)	7.0628	5.56, 13.35	9.429	6.73, 15.45	0.276	Dominant Arm: Path Length (m)	6.0519	5.45, 15.14	9.1125	6.16, 13.36	0.668	Dominant Arm: Path Length (m)	8.0449	5.86, 13.06	15.2676	7.33, 15.27	0.206	Dominant Arm: Path Length (m)	6.5165	5.51, 13.67	9.429	7.29, 15.27	0.244
	Dominant Arm: Active Time (s)	644.807	295.9, 828.1	778.385	652.1, 1052.0	0.121	Dominant Arm: Active Time (s)	572.652	285.5, 814.1	753.467	615.2, 1030.9	0.121	Dominant Arm: Active Time (s)	308.4	242.5, 835.4	683.045	462.1, 873.5	0.272	Dominant Arm: Active Time (s)	676.552	305.3, 843.2	803.303	585.7, 803.3	0.273	Dominant Arm: Active Time (s)	455.786	275.3, 813.3	753.467	644.8, 888.6	0.075
	Dominant Arm: Velocity (m/s)	0.015366	0.014, 0.019	0.012512	0.010, 0.017	0.106	Dominant Arm: Velocity (m/s)	0.016377	0.014, 0.019	0.012514	0.009, 0.016	0.014	Dominant Arm: Velocity (m/s)	0.021857	0.017, 0.023	0.01429	0.013, 0.017	0.003	Dominant Arm: Velocity (m/s)	0.015073	0.014, 0.019	0.012511	0.010, 0.013	0.398	Dominant Arm: Velocity (m/s)	0.017042	0.015, 0.020	0.012514	0.010, 0.015	0.003
	Non-Dominant Arm: Path Length (m)	7.153	4.93, 10.91	9.0427	6.18, 14.87	0.246	Non-Dominant Arm: Path Length (m)	6.6747	4.84, 10.79	8.7961	5.93, 15.59	0.136	Non-Dominant Arm: Path Length (m)	5.044	4.87, 13.65	7.2694	5.57, 10.88	0.621	Non-Dominant Arm: Path Length (m)	7.1933	5.02, 10.81	14.422	6.13, 14.42	0.177	Non-Dominant Arm: Path Length (m)	6.1182	4.74, 11.40	8.7961	6.13, 14.42	0.134
	Non-Dominant Arm: Active Time (s)	645.783	296.3, 831.9	770.319	648.6, 1045.2	0.121	Non-Dominant Arm: Active Time (s)	569.726	286.8, 820.5	748.922	618.4, 1015.2	0.121	Non-Dominant Arm: Active Time (s)	308.478	242.1, 848.5	683.104	462.4, 884.4	0.272	Non-Dominant Arm: Active Time (s)	673.509	305.4, 849.4	791.716	591.0, 791.7	0.273	Non-Dominant Arm: Active Time (s)	456.108	276.1, 823.7	748.922	645.8, 901.8	0.075
	Non-Dominant Arm: Velocity (m/s)	0.013621	0.011, 0.017	0.010065	0.009, 0.016	0.198	Non-Dominant Arm: Velocity (m/s)	0.01513	0.011, 0.017	0.010376	0.009, 0.016	0.169	Non-Dominant Arm: Velocity (m/s)	0.017369	0.015, 0.021	0.011912	0.010, 0.015	0.007	Non-Dominant Arm: Velocity (m/s)	0.013442	0.010, 0.016	0.010376	0.010, 0.010	0.783	Non-Dominant Arm: Velocity (m/s)	0.01532	0.012, 0.017	0.010376	0.010, 0.014	0.029
	Camera: Path Length (m)	1.2159	0.79, 1.84	1.4851	0.72, 2.16	0.642	Camera: Path Length (m)	1.2544	0.75, 1.81	1.1383	0.896, 2.15	0.522	Camera: Path Length (m)	1.1695	0.92, 2.26	1.2544	0.69, 1.84	0.668	Camera: Path Length (m)	1.1927	0.78, 1.83	2.073	0.67, 2.07	0.398	Camera: Path Length (m)	1.2544	0.75, 1.83	1.1383	0.74, 2.08	0.727
	Camera: Utilization Frequency (press/s)	0.0842	0, 0.122	0.0605	0.044, 0.085	0.333	Camera: Utilization Frequency (press/s)	0.087	0.059, 0.137	0.0582	0, 0.078	0.037	Camera: Utilization Frequency (press/s)	0.0842	0, 0.118	0.068	0.043, 0.092	0.869	Camera: Utilization Frequency (press/s)	0.0636	0, 0.100	0.0848	0.071, 0.085	0.721	Camera: Utilization Frequency (press/s)	0.0892	0.060, 0.144	0.0582	0, 0.085	0.021
	Masterclutch: Utilization Frequency (press/s)	0	0, 0	0	0, 0.004	0.166	Masterclutch: Utilization Frequency (press/s)	0	0, 0	0	0, 0.001	0.559	Masterclutch: Utilization Frequency (press/s)	0	0, 0	0	0, 0	0.621	Masterclutch: Utilization Frequency (press/s)	0	0, 0	0	0, 0	0.55	Masterclutch: Utilization Frequency (press/s)	0	0, 0	0	0, 0	0.687
